# Supplementary material for: A Contemporary Mini-Review of Interprofessional Education and Technology-Assisted Management of Dental Emergencies in the Emergency Department
Source: MDPI journal article supplement (doi:10.3390/healthcare14040544), 2026-02-22
Supplement: s1 [file healthcare-4104487-supplementary.pdf › healthcare-4104487-supplementary.pdf]

Table S1: Search strategy:

| # ▲ | Searches                        | Results |
|-----|---------------------------------|---------|
| 1   | interprofessional education.mp. | 5693    |
| 2   | technolog*.mp.                  | 1098363 |
| 3   | advance*.mp.                    | 1666216 |
| 4   | artificial intelligence.mp.     | 108112  |
| 5   | simulation.mp.                  | 612520  |
| 6   | virtual reality.mp.             | 39042   |
| 7   | augmented reality.mp.           | 7254    |
| 8   | 2 OR 3 OR 4 OR 5 OR 6 OR 7      | 138755  |
| 9   | dental emergenc*.mp.            | 650     |
| 10  | emergency medicine.mp.          | 67628   |
| 11  | emergency department.mp.        | 203262  |
| 12  | general hospital.mp.            | 85254   |
| 13  | 1 AND 8                         | 1429    |
| 14  | 9 AND 12                        | 4       |
| 15  | 1 AND 14                        | 0       |
| 16  | 8 AND 14                        | 1       |
| 17  | 1 AND 10                        | 65      |
| 18  | 8 AND 9                         | 28      |
| 19  | 9 AND 11                        | 75      |

|    |          |   |
|----|----------|---|
|    |          |   |
| 20 | 1 AND 19 | 0 |
| 21 | 8 AND 19 | 3 |
